# Supplementary material
Source: publisher figshare collection journal article supplement (https://acs.figshare.com/ndownloader/files/4590175)
Supplement: Supplementary file 1 [file 4590175]

data_e990a

 

_audit_creation_method            SHELXL-97

_chemical_name_systematic

;

 ?

;

_chemical_name_common             ?

_chemical_melting_point           ?

_chemical_formula_moiety

 '3(C14 H20 N4), 2(C6 Fe N6)'

_chemical_formula_sum

 'C54 H60 Fe2 N24'

_chemical_formula_weight          1156.96

 

loop_

 _atom_type_symbol

 _atom_type_description

 _atom_type_scat_dispersion_real

 _atom_type_scat_dispersion_imag

 _atom_type_scat_source

 'C'  'C'   0.0033   0.0016

 'International Tables Vol C Tables 4.2.6.8 and 6.1.1.4'

 'Fe'  'Fe'   0.3463   0.8444

 'International Tables Vol C Tables 4.2.6.8 and 6.1.1.4'

 'N'  'N'   0.0061   0.0033

 'International Tables Vol C Tables 4.2.6.8 and 6.1.1.4'

 'H'  'H'   0.0000   0.0000

 'International Tables Vol C Tables 4.2.6.8 and 6.1.1.4'

 

_symmetry_cell_setting            Triclinic

_symmetry_space_group_name_H-M    P-1

_symmetry_space_group_name_Hall   '-P 1'

 

loop_

 _symmetry_equiv_pos_as_xyz

 'x, y, z'

 '-x, -y, -z'

 

_cell_length_a                    7.2138(6)

_cell_length_b                    12.1706(11)

_cell_length_c                    17.3090(16)

_cell_angle_alpha                 84.987(2)

_cell_angle_beta                  89.044(3)

_cell_angle_gamma                 83.821(2)

_cell_volume                      1505.0(2)

_cell_formula_units_Z             1

_cell_measurement_temperature     173(2)

_cell_measurement_reflns_used     1722

_cell_measurement_theta_min       2.84

_cell_measurement_theta_max       23.14

 

_exptl_crystal_description        prism

_exptl_crystal_colour             colorless

_exptl_crystal_size_max           0.10

_exptl_crystal_size_mid           0.08

_exptl_crystal_size_min           0.06

_exptl_crystal_density_meas       none

_exptl_crystal_density_diffrn     1.277

_exptl_crystal_density_method     'not measured'

_exptl_crystal_F_000              604

_exptl_absorpt_coefficient_mu     0.539

_exptl_absorpt_correction_type    multi-scan

_exptl_absorpt_correction_T_min   0.9481

_exptl_absorpt_correction_T_max   0.9684

_exptl_absorpt_process_details    sadabs

 

_exptl_special_details

;

 ?

;

 

_diffrn_ambient_temperature       173(2)

_diffrn_radiation_wavelength      0.71073

_diffrn_radiation_type            MoK\a

_diffrn_radiation_source          'fine-focus sealed tube'

_diffrn_radiation_monochromator   graphite

_diffrn_measurement_device_type   'CCD area detector'

_diffrn_measurement_method        'phi and omega scans'

_diffrn_detector_area_resol_mean  ?

_diffrn_standards_number          ?

_diffrn_standards_interval_count  ?

_diffrn_standards_interval_time   ?

_diffrn_standards_decay_%         ?

_diffrn_reflns_number             10289

_diffrn_reflns_av_R_equivalents   0.0346

_diffrn_reflns_av_sigmaI/netI     0.0824

_diffrn_reflns_limit_h_min        -8

_diffrn_reflns_limit_h_max        9

_diffrn_reflns_limit_k_min        -15

_diffrn_reflns_limit_k_max        13

_diffrn_reflns_limit_l_min        -22

_diffrn_reflns_limit_l_max        21

_diffrn_reflns_theta_min          2.78

_diffrn_reflns_theta_max          27.00

_reflns_number_total              6335

_reflns_number_gt                 4018

_reflns_threshold_expression      >2sigma(I)

 

_computing_data_collection        'Bruker SMART'

_computing_cell_refinement        'Bruker SMART'

_computing_data_reduction         'Bruker SAINT'

_computing_structure_solution     'SHELXS-97 (Sheldrick, 1990)'

_computing_structure_refinement   'SHELXL-97 (Sheldrick, 1997)'

_computing_molecular_graphics     'Bruker SHELXTL'

_computing_publication_material   'Bruker SHELXTL'

 

_refine_special_details

;

 Refinement of F^2^ against ALL reflections.  The weighted R-factor wR and

 goodness of fit S are based on F^2^, conventional R-factors R are based

 on F, with F set to zero for negative F^2^. The threshold expression of

 F^2^ > 2sigma(F^2^) is used only for calculating R-factors(gt) etc. and is

 not relevant to the choice of reflections for refinement.  R-factors based

 on F^2^ are statistically about twice as large as those based on F, and R-

 factors based on ALL data will be even larger.

;

 

_refine_ls_structure_factor_coef  Fsqd

_refine_ls_matrix_type            full

_refine_ls_weighting_scheme       calc

_refine_ls_weighting_details

 'calc w=1/[\s^2^(Fo^2^)+(0.0000P)^2^+0.0000P] where P=(Fo^2^+2Fc^2^)/3'

_atom_sites_solution_primary      direct

_atom_sites_solution_secondary    difmap

_atom_sites_solution_hydrogens    geom

_refine_ls_hydrogen_treatment     constr

_refine_ls_extinction_method      none

_refine_ls_extinction_coef        ?

_refine_ls_number_reflns          6335

_refine_ls_number_parameters      361

_refine_ls_number_restraints      0

_refine_ls_R_factor_all           0.0930

_refine_ls_R_factor_gt            0.0487

_refine_ls_wR_factor_ref          0.0718

_refine_ls_wR_factor_gt           0.0656

_refine_ls_goodness_of_fit_ref    1.283

_refine_ls_restrained_S_all       1.283

_refine_ls_shift/su_max           0.001

_refine_ls_shift/su_mean          0.000

 

loop_

 _atom_site_label

 _atom_site_type_symbol

 _atom_site_fract_x

 _atom_site_fract_y

 _atom_site_fract_z

 _atom_site_U_iso_or_equiv

 _atom_site_adp_type

 _atom_site_occupancy

 _atom_site_symmetry_multiplicity

 _atom_site_calc_flag

 _atom_site_refinement_flags

 _atom_site_disorder_assembly

 _atom_site_disorder_group

C1 C 0.8298(3) 0.8456(2) 1.00089(15) 0.0239(7) Uani 1 1 d . . .

N1 N 0.8302(3) 0.75016(18) 1.04267(12) 0.0267(6) Uani 1 1 d . . .

H1 H 0.7268 0.7347 1.0670 0.032 Uiso 1 1 calc R . .

C2 C 0.9952(4) 0.6678(2) 1.05081(16) 0.0341(8) Uani 1 1 d . . .

H2A H 0.9559 0.5921 1.0562 0.041 Uiso 1 1 calc R . .

H2B H 1.0648 0.6784 1.0979 0.041 Uiso 1 1 calc R . .

C3 C 1.1199(4) 0.6815(2) 0.97968(17) 0.0400(9) Uani 1 1 d . . .

H3A H 1.0592 0.6572 0.9342 0.048 Uiso 1 1 calc R . .

H3B H 1.2399 0.6347 0.9883 0.048 Uiso 1 1 calc R . .

C4 C 1.1549(3) 0.8018(2) 0.96411(17) 0.0334(8) Uani 1 1 d . . .

H4A H 1.2313 0.8232 1.0062 0.040 Uiso 1 1 calc R . .

H4B H 1.2243 0.8122 0.9146 0.040 Uiso 1 1 calc R . .

N2 N 0.9766(3) 0.87178(18) 0.95976(12) 0.0261(6) Uani 1 1 d . . .

H2 H 0.9670 0.9333 0.9287 0.031 Uiso 1 1 calc R . .

C5 C 0.6589(3) 0.9252(2) 1.00011(15) 0.0211(7) Uani 1 1 d . . .

C6 C 0.5758(3) 0.9520(2) 1.07051(15) 0.0219(7) Uani 1 1 d . . .

H6 H 0.6274 0.9194 1.1183 0.026 Uiso 1 1 calc R . .

C7 C 0.4171(3) 1.0269(2) 1.06941(16) 0.0237(7) Uani 1 1 d . . .

H7 H 0.3595 1.0456 1.1169 0.028 Uiso 1 1 calc R . .

C8 C 0.7928(3) 0.0779(2) 0.40223(15) 0.0186(6) Uani 1 1 d . . .

N3 N 0.9344(3) 0.11495(17) 0.43493(12) 0.0239(6) Uani 1 1 d . . .

H3 H 0.9319 0.1197 0.4854 0.029 Uiso 1 1 calc R . .

C9 C 1.0960(3) 0.1485(2) 0.39029(16) 0.0349(8) Uani 1 1 d . . .

H9A H 1.1921 0.0843 0.3884 0.042 Uiso 1 1 calc R . .

H9B H 1.1507 0.2071 0.4158 0.042 Uiso 1 1 calc R . .

C10 C 1.0372(4) 0.1915(2) 0.30923(16) 0.0341(8) Uani 1 1 d . . .

H10A H 1.1491 0.2036 0.2770 0.041 Uiso 1 1 calc R . .

H10B H 0.9599 0.2637 0.3106 0.041 Uiso 1 1 calc R . .

C11 C 0.9268(4) 0.1100(2) 0.27330(16) 0.0296(7) Uani 1 1 d . . .

H11A H 0.8705 0.1449 0.2241 0.036 Uiso 1 1 calc R . .

H11B H 1.0110 0.0438 0.2614 0.036 Uiso 1 1 calc R . .

N4 N 0.7791(3) 0.07650(17) 0.32704(12) 0.0222(5) Uani 1 1 d . . .

H4 H 0.6781 0.0548 0.3080 0.027 Uiso 1 1 calc R . .

C12 C 0.6408(3) 0.0371(2) 0.45287(15) 0.0182(6) Uani 1 1 d . . .

C13 C 0.5629(3) 0.1018(2) 0.50995(14) 0.0206(6) Uani 1 1 d . . .

H13 H 0.6070 0.1712 0.5166 0.025 Uiso 1 1 calc R . .

C14 C 0.4204(3) 0.0650(2) 0.55739(15) 0.0202(6) Uani 1 1 d . . .

H14 H 0.3657 0.1090 0.5962 0.024 Uiso 1 1 calc R . .

C15 C 0.2847(3) 0.5516(2) 0.60047(16) 0.0204(6) Uani 1 1 d . . .

N5 N 0.2687(3) 0.52981(18) 0.67560(12) 0.0234(6) Uani 1 1 d . . .

H5 H 0.1665 0.5031 0.6939 0.028 Uiso 1 1 calc R . .

C16 C 0.4123(3) 0.5476(2) 0.73076(16) 0.0285(7) Uani 1 1 d . . .

H16A H 0.4963 0.4783 0.7416 0.034 Uiso 1 1 calc R . .

H16B H 0.3529 0.5681 0.7802 0.034 Uiso 1 1 calc R . .

C17 C 0.5241(4) 0.6396(2) 0.69717(16) 0.0331(8) Uani 1 1 d . . .

H17A H 0.4464 0.7119 0.6966 0.040 Uiso 1 1 calc R . .

H17B H 0.6343 0.6428 0.7299 0.040 Uiso 1 1 calc R . .

C18 C 0.5866(3) 0.6182(2) 0.61535(16) 0.0355(8) Uani 1 1 d . . .

H18A H 0.6445 0.6831 0.5912 0.043 Uiso 1 1 calc R . .

H18B H 0.6813 0.5529 0.6169 0.043 Uiso 1 1 calc R . .

N6 N 0.4294(3) 0.59844(18) 0.56906(13) 0.0272(6) Uani 1 1 d . . .

H6A H 0.4301 0.6180 0.5189 0.033 Uiso 1 1 calc R . .

C19 C 0.1372(3) 0.5248(2) 0.54859(15) 0.0198(6) Uani 1 1 d . . .

C20 C 0.0724(3) 0.4209(2) 0.55804(15) 0.0206(7) Uani 1 1 d . . .

H20 H 0.1221 0.3671 0.5975 0.025 Uiso 1 1 calc R . .

C21 C 0.0654(3) 0.6035(2) 0.49065(15) 0.0217(7) Uani 1 1 d . . .

H21 H 0.1109 0.6742 0.4844 0.026 Uiso 1 1 calc R . .

Fe2 Fe 0.74332(5) 0.22100(4) 0.73719(2) 0.02124(11) Uani 1 1 d . . .

C22 C 0.5808(4) 0.2764(2) 0.81956(16) 0.0242(7) Uani 1 1 d . . .

N7 N 0.4889(3) 0.30923(19) 0.86942(14) 0.0369(7) Uani 1 1 d . . .

C23 C 0.8745(3) 0.3523(2) 0.74004(15) 0.0219(7) Uani 1 1 d . . .

N8 N 0.9491(3) 0.4319(2) 0.74119(13) 0.0327(6) Uani 1 1 d . . .

C24 C 0.5934(3) 0.2977(2) 0.65250(16) 0.0214(7) Uani 1 1 d . . .

N9 N 0.5188(3) 0.34008(19) 0.59716(13) 0.0274(6) Uani 1 1 d . . .

C25 C 0.8995(3) 0.1670(2) 0.65345(16) 0.0205(7) Uani 1 1 d . . .

N10 N 0.9789(3) 0.13826(18) 0.59875(13) 0.0263(6) Uani 1 1 d . . .

C26 C 0.6109(3) 0.0899(2) 0.73519(15) 0.0223(7) Uani 1 1 d . . .

N11 N 0.5370(3) 0.0106(2) 0.73451(13) 0.0314(6) Uani 1 1 d . . .

C27 C 0.8996(3) 0.1350(2) 0.81669(15) 0.0208(7) Uani 1 1 d . . .

N12 N 0.9824(3) 0.07842(19) 0.86346(13) 0.0276(6) Uani 1 1 d . . .

 

loop_

 _atom_site_aniso_label

 _atom_site_aniso_U_11

 _atom_site_aniso_U_22

 _atom_site_aniso_U_33

 _atom_site_aniso_U_23

 _atom_site_aniso_U_13

 _atom_site_aniso_U_12

C1 0.0239(15) 0.0259(19) 0.0207(16) 0.0021(14) -0.0011(12) -0.0005(13)

N1 0.0223(12) 0.0244(15) 0.0306(15) 0.0055(12) 0.0046(11) 0.0039(11)

C2 0.0380(18) 0.0244(19) 0.038(2) 0.0026(15) 0.0054(15) 0.0023(15)

C3 0.0365(18) 0.037(2) 0.042(2) 0.0023(17) 0.0058(16) 0.0116(16)

C4 0.0225(16) 0.033(2) 0.041(2) 0.0015(16) 0.0061(14) 0.0055(14)

N2 0.0229(12) 0.0255(15) 0.0269(14) 0.0087(11) 0.0017(11) 0.0015(11)

C5 0.0177(14) 0.0183(17) 0.0255(17) 0.0050(13) 0.0018(12) 0.0007(12)

C6 0.0236(15) 0.0202(18) 0.0208(16) 0.0028(13) 0.0001(13) -0.0004(13)

C7 0.0217(15) 0.0262(18) 0.0227(16) -0.0004(14) 0.0057(13) -0.0032(13)

C8 0.0204(14) 0.0139(16) 0.0211(16) -0.0034(13) 0.0023(12) 0.0010(12)

N3 0.0219(12) 0.0288(15) 0.0227(14) -0.0061(11) 0.0042(10) -0.0086(11)

C9 0.0255(16) 0.045(2) 0.037(2) -0.0055(17) 0.0082(14) -0.0152(15)

C10 0.0315(17) 0.039(2) 0.0331(19) 0.0004(16) 0.0100(14) -0.0124(15)

C11 0.0315(16) 0.031(2) 0.0256(17) 0.0008(14) 0.0098(13) -0.0046(14)

N4 0.0200(12) 0.0254(15) 0.0216(14) -0.0013(11) 0.0020(10) -0.0057(10)

C12 0.0147(13) 0.0191(17) 0.0207(16) -0.0002(13) -0.0012(11) -0.0022(12)

C13 0.0199(14) 0.0184(17) 0.0240(16) -0.0012(13) 0.0006(12) -0.0056(12)

C14 0.0194(14) 0.0220(18) 0.0193(16) -0.0037(13) 0.0003(12) -0.0015(13)

C15 0.0198(14) 0.0153(17) 0.0248(16) 0.0008(13) -0.0009(12) 0.0014(12)

N5 0.0218(12) 0.0252(15) 0.0228(14) 0.0019(11) 0.0016(10) -0.0047(11)

C16 0.0295(16) 0.0288(19) 0.0275(18) 0.0000(14) -0.0072(13) -0.0053(14)

C17 0.0333(17) 0.027(2) 0.040(2) -0.0010(15) -0.0122(15) -0.0082(14)

C18 0.0243(16) 0.044(2) 0.039(2) 0.0087(16) -0.0102(14) -0.0154(15)

N6 0.0244(13) 0.0313(16) 0.0254(14) 0.0112(12) -0.0048(11) -0.0113(11)

C19 0.0163(14) 0.0203(17) 0.0226(16) 0.0007(13) 0.0016(12) -0.0028(12)

C20 0.0176(14) 0.0186(17) 0.0240(16) 0.0046(13) -0.0007(12) -0.0002(12)

C21 0.0211(15) 0.0158(16) 0.0278(17) 0.0032(13) 0.0002(13) -0.0043(12)

Fe2 0.0198(2) 0.0226(3) 0.0206(2) 0.00320(19) 0.00068(17) -0.00321(18)

C22 0.0252(16) 0.0198(18) 0.0261(18) 0.0048(14) 0.0017(13) -0.0015(13)

N7 0.0408(16) 0.0327(18) 0.0353(17) -0.0001(13) 0.0156(13) -0.0007(13)

C23 0.0206(14) 0.029(2) 0.0152(15) 0.0000(14) 0.0039(12) -0.0013(14)

N8 0.0328(14) 0.0343(17) 0.0325(16) 0.0004(13) 0.0048(12) -0.0135(13)

C24 0.0195(15) 0.0203(18) 0.0238(17) -0.0011(14) 0.0057(13) -0.0010(13)

N9 0.0276(13) 0.0267(16) 0.0262(15) 0.0032(12) -0.0009(11) 0.0011(11)

C25 0.0197(15) 0.0174(17) 0.0235(17) 0.0065(13) -0.0067(13) -0.0029(13)

N10 0.0275(13) 0.0265(16) 0.0236(15) 0.0026(12) 0.0020(11) -0.0016(11)

C26 0.0224(15) 0.028(2) 0.0153(15) 0.0010(14) -0.0026(12) -0.0003(14)

N11 0.0352(15) 0.0354(17) 0.0245(15) 0.0046(12) -0.0064(12) -0.0130(13)

C27 0.0215(15) 0.0233(18) 0.0186(16) -0.0048(14) 0.0033(12) -0.0051(13)

N12 0.0272(14) 0.0267(16) 0.0276(15) 0.0037(12) -0.0045(11) -0.0019(12)

 

_geom_special_details

;

 All esds (except the esd in the dihedral angle between two l.s. planes)

 are estimated using the full covariance matrix.  The cell esds are taken

 into account individually in the estimation of esds in distances, angles

 and torsion angles; correlations between esds in cell parameters are only

 used when they are defined by crystal symmetry.  An approximate (isotropic)

 treatment of cell esds is used for estimating esds involving l.s. planes.

;

 

loop_

 _geom_bond_atom_site_label_1

 _geom_bond_atom_site_label_2

 _geom_bond_distance

 _geom_bond_site_symmetry_2

 _geom_bond_publ_flag

C1 N2 1.318(3) . ?

C1 N1 1.313(3) . ?

C1 C5 1.484(3) . ?

N1 C2 1.471(3) . ?

N1 H1 0.8800 . ?

C2 C3 1.520(3) . ?

C2 H2A 0.9900 . ?

C2 H2B 0.9900 . ?

C3 C4 1.512(4) . ?

C3 H3A 0.9900 . ?

C3 H3B 0.9900 . ?

C4 N2 1.464(3) . ?

C4 H4A 0.9900 . ?

C4 H4B 0.9900 . ?

N2 H2 0.8800 . ?

C5 C7 1.385(3) 2_677 ?

C5 C6 1.398(3) . ?

C6 C7 1.383(3) . ?

C6 H6 0.9500 . ?

C7 C5 1.385(3) 2_677 ?

C7 H7 0.9500 . ?

C8 N4 1.308(3) . ?

C8 N3 1.316(3) . ?

C8 C12 1.492(3) . ?

N3 C9 1.463(3) . ?

N3 H3 0.8800 . ?

C9 C10 1.505(4) . ?

C9 H9A 0.9900 . ?

C9 H9B 0.9900 . ?

C10 C11 1.516(3) . ?

C10 H10A 0.9900 . ?

C10 H10B 0.9900 . ?

C11 N4 1.470(3) . ?

C11 H11A 0.9900 . ?

C11 H11B 0.9900 . ?

N4 H4 0.8800 . ?

C12 C14 1.388(3) 2_656 ?

C12 C13 1.391(3) . ?

C13 C14 1.393(3) . ?

C13 H13 0.9500 . ?

C14 C12 1.388(3) 2_656 ?

C14 H14 0.9500 . ?

C15 N5 1.310(3) . ?

C15 N6 1.329(3) . ?

C15 C19 1.484(3) . ?

N5 C16 1.466(3) . ?

N5 H5 0.8800 . ?

C16 C17 1.519(3) . ?

C16 H16A 0.9900 . ?

C16 H16B 0.9900 . ?

C17 C18 1.515(3) . ?

C17 H17A 0.9900 . ?

C17 H17B 0.9900 . ?

C18 N6 1.452(3) . ?

C18 H18A 0.9900 . ?

C18 H18B 0.9900 . ?

N6 H6A 0.8800 . ?

C19 C21 1.391(3) . ?

C19 C20 1.391(3) . ?

C20 C21 1.386(3) 2_566 ?

C20 H20 0.9500 . ?

C21 C20 1.386(3) 2_566 ?

C21 H21 0.9500 . ?

Fe2 C25 1.938(3) . ?

Fe2 C24 1.946(3) . ?

Fe2 C23 1.947(3) . ?

Fe2 C22 1.950(3) . ?

Fe2 C26 1.949(3) . ?

Fe2 C27 1.951(3) . ?

C22 N7 1.152(3) . ?

C23 N8 1.160(3) . ?

C24 N9 1.159(3) . ?

C25 N10 1.159(3) . ?

C26 N11 1.152(3) . ?

C27 N12 1.147(3) . ?

 

loop_

 _geom_angle_atom_site_label_1

 _geom_angle_atom_site_label_2

 _geom_angle_atom_site_label_3

 _geom_angle

 _geom_angle_site_symmetry_1

 _geom_angle_site_symmetry_3

 _geom_angle_publ_flag

N2 C1 N1 121.7(2) . . ?

N2 C1 C5 119.6(2) . . ?

N1 C1 C5 118.7(2) . . ?

C1 N1 C2 123.2(2) . . ?

C1 N1 H1 118.4 . . ?

C2 N1 H1 118.4 . . ?

N1 C2 C3 109.4(2) . . ?

N1 C2 H2A 109.8 . . ?

C3 C2 H2A 109.8 . . ?

N1 C2 H2B 109.8 . . ?

C3 C2 H2B 109.8 . . ?

H2A C2 H2B 108.3 . . ?

C2 C3 C4 109.8(2) . . ?

C2 C3 H3A 109.7 . . ?

C4 C3 H3A 109.7 . . ?

C2 C3 H3B 109.7 . . ?

C4 C3 H3B 109.7 . . ?

H3A C3 H3B 108.2 . . ?

N2 C4 C3 109.5(2) . . ?

N2 C4 H4A 109.8 . . ?

C3 C4 H4A 109.8 . . ?

N2 C4 H4B 109.8 . . ?

C3 C4 H4B 109.8 . . ?

H4A C4 H4B 108.2 . . ?

C1 N2 C4 122.1(2) . . ?

C1 N2 H2 119.0 . . ?

C4 N2 H2 119.0 . . ?

C7 C5 C6 120.3(2) 2_677 . ?

C7 C5 C1 120.6(2) 2_677 . ?

C6 C5 C1 119.2(2) . . ?

C7 C6 C5 118.9(2) . . ?

C7 C6 H6 120.5 . . ?

C5 C6 H6 120.5 . . ?

C6 C7 C5 120.8(2) . 2_677 ?

C6 C7 H7 119.6 . . ?

C5 C7 H7 119.6 2_677 . ?

N4 C8 N3 122.6(2) . . ?

N4 C8 C12 118.8(2) . . ?

N3 C8 C12 118.7(2) . . ?

C8 N3 C9 122.3(2) . . ?

C8 N3 H3 118.9 . . ?

C9 N3 H3 118.9 . . ?

N3 C9 C10 109.7(2) . . ?

N3 C9 H9A 109.7 . . ?

C10 C9 H9A 109.7 . . ?

N3 C9 H9B 109.7 . . ?

C10 C9 H9B 109.7 . . ?

H9A C9 H9B 108.2 . . ?

C9 C10 C11 110.7(2) . . ?

C9 C10 H10A 109.5 . . ?

C11 C10 H10A 109.5 . . ?

C9 C10 H10B 109.5 . . ?

C11 C10 H10B 109.5 . . ?

H10A C10 H10B 108.1 . . ?

N4 C11 C10 110.0(2) . . ?

N4 C11 H11A 109.7 . . ?

C10 C11 H11A 109.7 . . ?

N4 C11 H11B 109.7 . . ?

C10 C11 H11B 109.7 . . ?

H11A C11 H11B 108.2 . . ?

C8 N4 C11 122.2(2) . . ?

C8 N4 H4 118.9 . . ?

C11 N4 H4 118.9 . . ?

C14 C12 C13 121.0(2) 2_656 . ?

C14 C12 C8 119.6(2) 2_656 . ?

C13 C12 C8 119.4(2) . . ?

C12 C13 C14 120.0(2) . . ?

C12 C13 H13 120.0 . . ?

C14 C13 H13 120.0 . . ?

C12 C14 C13 119.0(2) 2_656 . ?

C12 C14 H14 120.5 2_656 . ?

C13 C14 H14 120.5 . . ?

N5 C15 N6 121.7(2) . . ?

N5 C15 C19 119.7(2) . . ?

N6 C15 C19 118.7(2) . . ?

C15 N5 C16 123.3(2) . . ?

C15 N5 H5 118.3 . . ?

C16 N5 H5 118.3 . . ?

N5 C16 C17 109.7(2) . . ?

N5 C16 H16A 109.7 . . ?

C17 C16 H16A 109.7 . . ?

N5 C16 H16B 109.7 . . ?

C17 C16 H16B 109.7 . . ?

H16A C16 H16B 108.2 . . ?

C18 C17 C16 109.8(2) . . ?

C18 C17 H17A 109.7 . . ?

C16 C17 H17A 109.7 . . ?

C18 C17 H17B 109.7 . . ?

C16 C17 H17B 109.7 . . ?

H17A C17 H17B 108.2 . . ?

N6 C18 C17 110.6(2) . . ?

N6 C18 H18A 109.5 . . ?

C17 C18 H18A 109.5 . . ?

N6 C18 H18B 109.5 . . ?

C17 C18 H18B 109.5 . . ?

H18A C18 H18B 108.1 . . ?

C15 N6 C18 121.7(2) . . ?

C15 N6 H6A 119.1 . . ?

C18 N6 H6A 119.1 . . ?

C21 C19 C20 120.4(2) . . ?

C21 C19 C15 119.9(3) . . ?

C20 C19 C15 119.7(3) . . ?

C21 C20 C19 119.4(3) 2_566 . ?

C21 C20 H20 120.3 2_566 . ?

C19 C20 H20 120.3 . . ?

C19 C21 C20 120.2(3) . 2_566 ?

C19 C21 H21 119.9 . . ?

C20 C21 H21 119.9 2_566 . ?

C25 Fe2 C24 83.19(11) . . ?

C25 Fe2 C23 92.35(11) . . ?

C24 Fe2 C23 88.79(11) . . ?

C25 Fe2 C22 178.51(12) . . ?

C24 Fe2 C22 95.38(11) . . ?

C23 Fe2 C22 88.04(10) . . ?

C25 Fe2 C26 88.15(11) . . ?

C24 Fe2 C26 91.35(11) . . ?

C23 Fe2 C26 179.49(12) . . ?

C22 Fe2 C26 91.45(11) . . ?

C25 Fe2 C27 92.89(10) . . ?

C24 Fe2 C27 175.48(12) . . ?

C23 Fe2 C27 93.63(11) . . ?

C22 Fe2 C27 88.52(11) . . ?

C26 Fe2 C27 86.27(11) . . ?

N7 C22 Fe2 178.2(3) . . ?

N8 C23 Fe2 178.5(3) . . ?

N9 C24 Fe2 173.1(2) . . ?

N10 C25 Fe2 173.5(2) . . ?

N11 C26 Fe2 178.1(2) . . ?

N12 C27 Fe2 174.8(2) . . ?

 

_diffrn_measured_fraction_theta_max    0.968

_diffrn_reflns_theta_full              27.00

_diffrn_measured_fraction_theta_full   0.968

_refine_diff_density_max    0.389

_refine_diff_density_min   -0.507

_refine_diff_density_rms    0.073
